# Supplementary material for: Dual precipitating reagents-assisted deep blue-emitting borate and near-white oxide-based luminescent materials
Source: Royal Society of Chemistry journal article supplement (doi:10.1039/d4dt00290c), 2024-01-01
Supplement: d4dt00290c1.pdf [file d4dt00290c1.pdf]

### Supplementary information

#### Dual precipitating reagents-assisted deep blue-emitting borate and near-white oxide-based luminescent materials

Mridula Ghosh, Bibhuti B. Nayak\*

Department of Ceramic Engineering, National Institute of Technology Rourkela, PIN-769008,  
Odisha, INDIA

\*Corresponding author email: [bbnayak@nitrkl.ac.in](mailto:bbnayak@nitrkl.ac.in)

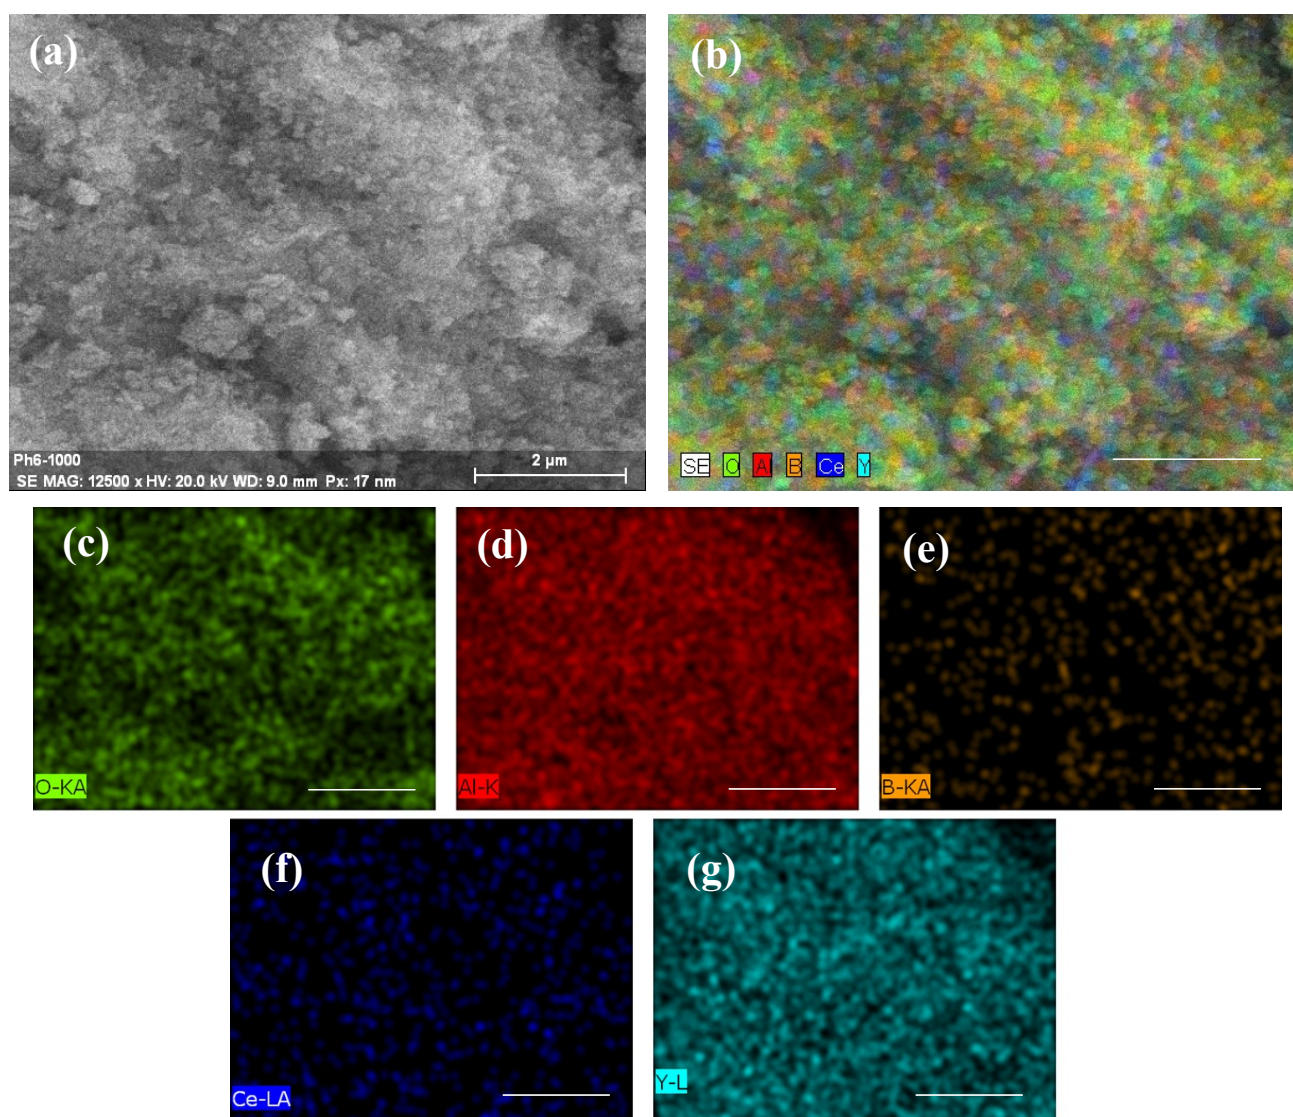

Fig.S1: FESEM micrograph (a) and EDX mapping of all elements (b) and uniform distribution of individual elements such as O, Al, B, Ce, and Y are shown in (c)-(g), respectively, for the samples calcined at 1000 °C for 1hr. The scale bar is 2μm.

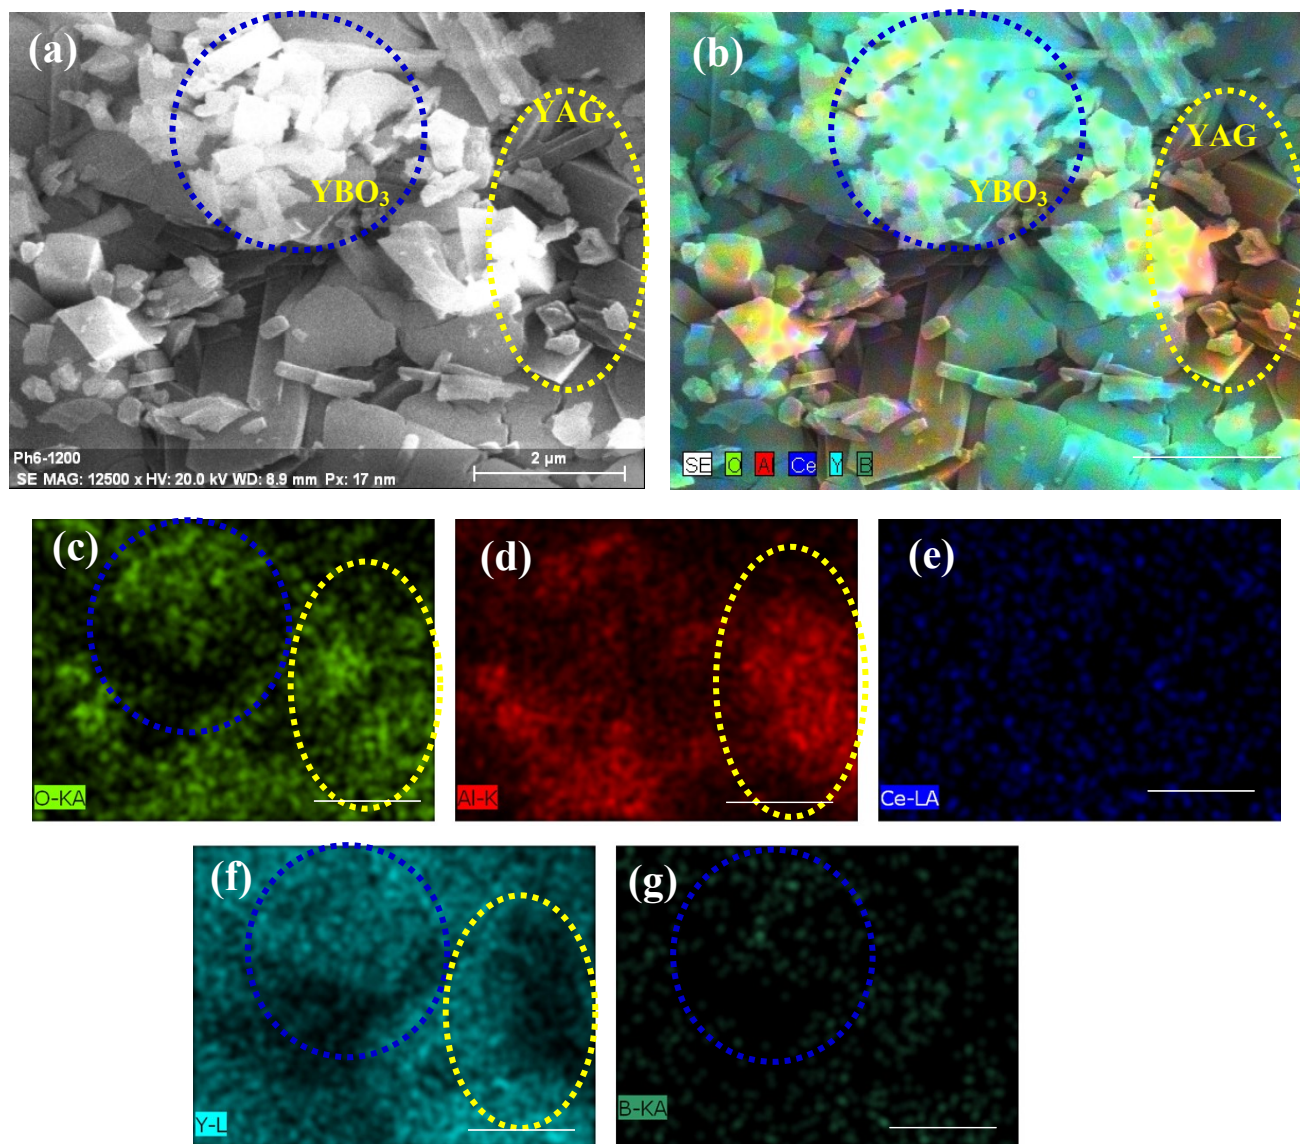

Fig.S2: FESEM micrograph (a) and EDX mapping of all elements (b) and uniform distribution of individual elements such as O, Al, Ce, Y, and B are shown in (c)-(g), respectively, for the samples calcined at 1200 °C for 1hr. The presence of YBO<sub>3</sub> and YAG are marked in blue and yellow circles, respectively. The scale bar is 2μm.



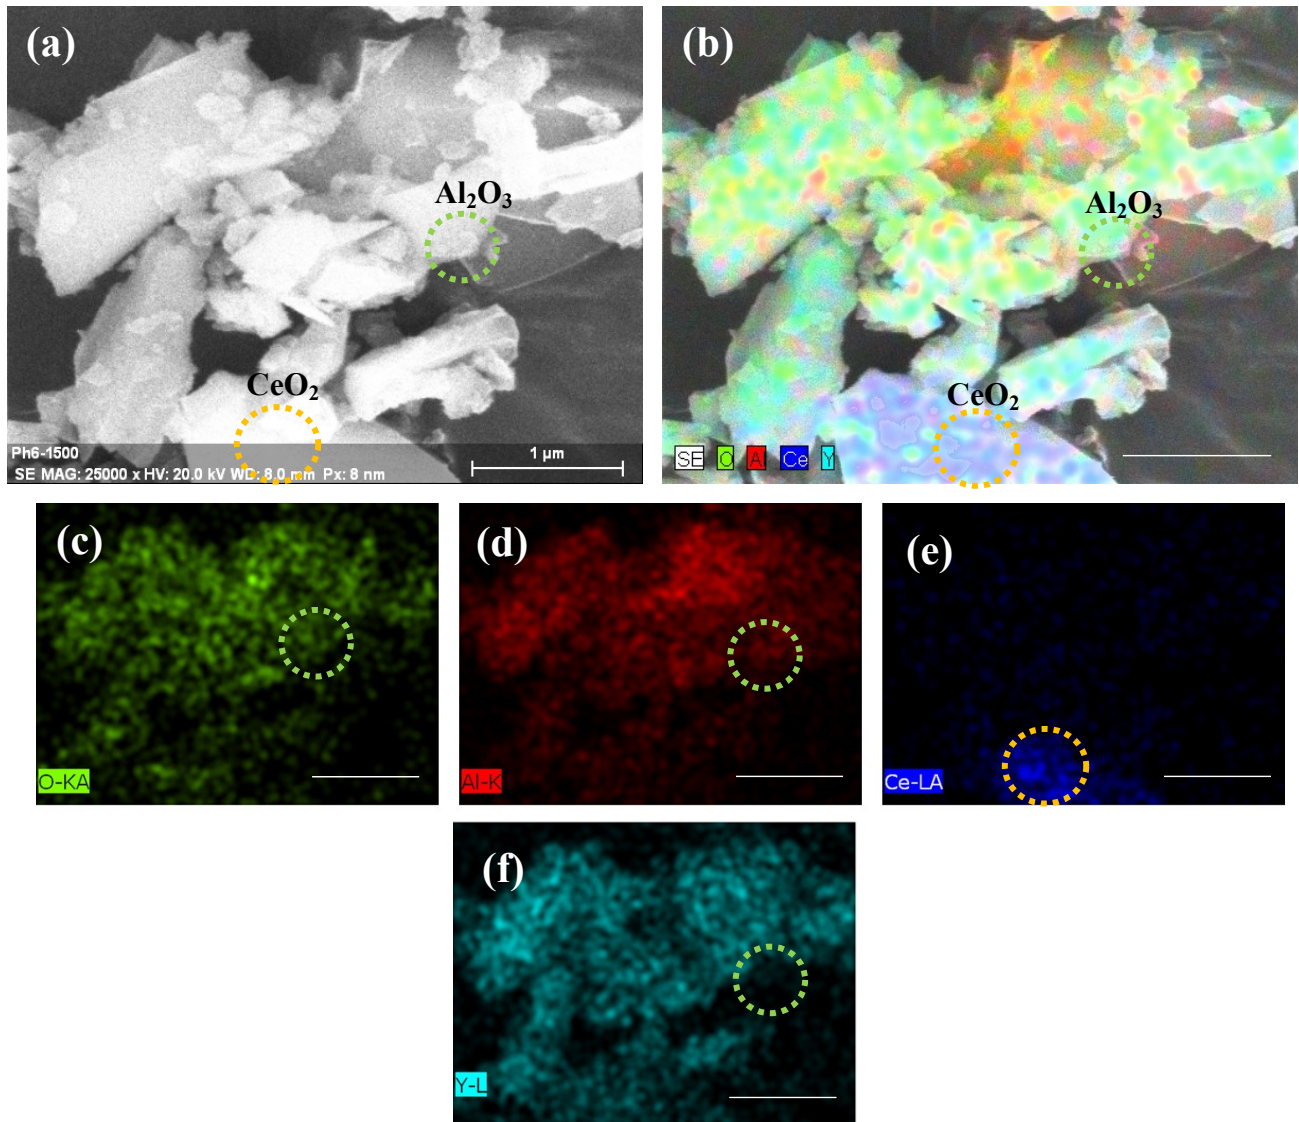

Fig.S3: FESEM micrograph (a) and EDX mapping of all elements (b) and uniform distribution of individual elements such as O, Al, Ce, and Y are shown in (c)-(f), respectively, for the samples calcined at 1500 °C for 1hr. The presence of Al<sub>2</sub>O<sub>3</sub> and CeO<sub>2</sub> are marked in green and orange circles, respectively. The scale bar is 1μm.

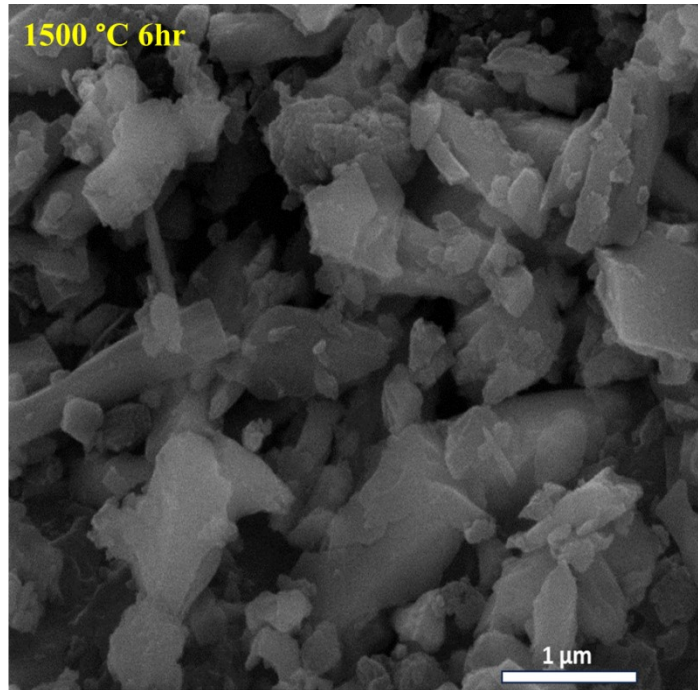

Fig.S4: FESEM micrograph of the YAG-based samples calcined at 1500 °C for 6 hours.
